# Supplementary material
Source: Springer Nature journal article supplement (https://www.springermedizin.de/resource/supplementary/12985_2012_2090_MOESM2_ESM.pdf/9606688)

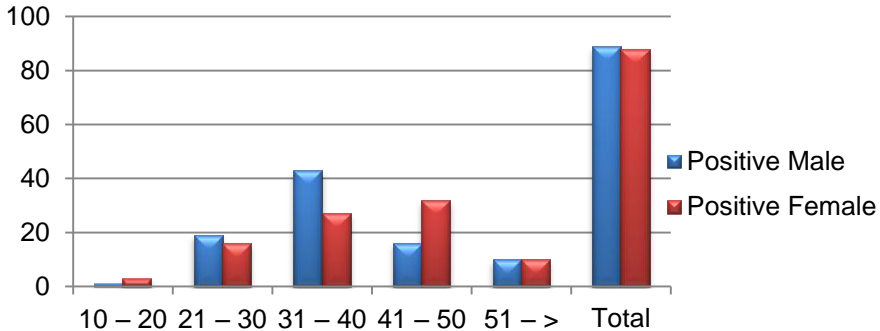

Supplement: MOESM2 [file 9606688]
